# Supplementary material for: Theoretical insight into the photophysical properties of five phosphorescent heteroleptic iridium(III) complexes bearing oxadiazolsubstituted amide ligands
Source: Royal Society of Chemistry journal article supplement (doi:10.1039/c8pp00511g), 2019-01-08
Supplement: c8pp00511g1.pdf [file c8pp00511g1.pdf]

**Table S1** Frontier molecular orbital energies (eV) and compositions (%) in the ground state for complex **1**. (Ir, ML and POXD denote the iridium atom, main ligand and N-(5-phenyl-1,3,4-oxadiazol-2-yl)-diphenylphosphinic amide ligand, respectively, in the complex.)

| MO                               | Energy | Compositions |    |      | Assignment             |
|----------------------------------|--------|--------------|----|------|------------------------|
|                                  |        | Ir           | ML | POXD |                        |
| L+10                             | 0.15   | 11           | 83 | 6    | d*(Ir)+ $\pi^*$ (ML)   |
| L+9                              | 0.01   | 0            | 2  | 98   | $\pi^*$ (POXD)         |
| L+8                              | -0.07  | 0            | 0  | 100  | $\pi^*$ (POXD)         |
| L+7                              | -0.17  | 0            | 2  | 98   | $\pi^*$ (POXD)         |
| L+6                              | -0.28  | 0            | 1  | 98   | $\pi^*$ (POXD)         |
| L+5                              | -0.77  | 1            | 97 | 2    | $\pi^*$ (ML)           |
| L+4                              | -0.87  | 0            | 3  | 97   | $\pi^*$ (POXD)         |
| L+3                              | -0.88  | 0            | 95 | 5    | $\pi^*$ (ML)           |
| L+2                              | -1.16  | 0            | 5  | 94   | $\pi^*$ (POXD)         |
| L+1                              | -1.83  | 3            | 96 | 1    | $\pi^*$ (ML)           |
| L                                | -1.91  | 3            | 96 | 2    | $\pi^*$ (ML)           |
| HOMO–LUMO energy gap ( 3.57 eV ) |        |              |    |      |                        |
| H                                | -5.48  | 41           | 47 | 11   | d(Ir)+ $\pi$ (ML+POXD) |
| H-1                              | -5.84  | 31           | 20 | 49   | d(Ir)+ $\pi$ (ML+POXD) |
| H-2                              | -6.24  | 46           | 36 | 18   | d(Ir)+ $\pi$ (ML+POXD) |
| H-3                              | -6.43  | 24           | 66 | 10   | d(Ir)+ $\pi$ (ML+POXD) |
| H-4                              | -6.56  | 16           | 71 | 13   | d(Ir)+ $\pi$ (ML+POXD) |
| H-5                              | -6.75  | 9            | 86 | 6    | $\pi$ (ML)             |
| H-6                              | -6.88  | 3            | 94 | 4    | $\pi$ (ML)             |
| H-7                              | -7.01  | 6            | 78 | 16   | $\pi$ (ML+POXD)        |
| H-8                              | -7.12  | 22           | 62 | 15   | d(Ir)+ $\pi$ (ML+POXD) |
| H-9                              | -7.34  | 2            | 6  | 92   | $\pi$ (POXD)           |
| H-10                             | -7.43  | 1            | 6  | 93   | $\pi$ (POXD)           |

**Table S2** Frontier molecular orbital energies (eV) and compositions (%) in the ground state for complex **2**. (Ir, ML and POXD denote the iridium atom, main ligand and N-(5-phenyl-1,3,4-oxadiazol-2-yl)-diphenylphosphinic amide ligand, respectively, in the complex.)

| MO                               | Energy | Compositions |     |      | Assignment                                |
|----------------------------------|--------|--------------|-----|------|-------------------------------------------|
|                                  |        | Ir           | ML  | POXD |                                           |
| L+10                             | -0.04  | 0            | 94  | 6    | $\pi^*(\text{ML})$                        |
| L+9                              | -0.10  | 0            | 1   | 99   | $\pi^*(\text{POXD})$                      |
| L+8                              | -0.14  | 0            | 4   | 95   | $\pi^*(\text{POXD})$                      |
| L+7                              | -0.33  | 0            | 3   | 96   | $\pi^*(\text{POXD})$                      |
| L+6                              | -0.37  | 0            | 1   | 99   | $\pi^*(\text{POXD})$                      |
| L+5                              | -0.79  | 2            | 95  | 3    | $\pi^*(\text{ML})$                        |
| L+4                              | -0.91  | 3            | 92  | 6    | $\pi^*(\text{ML})$                        |
| L+3                              | -0.98  | 0            | 5   | 95   | $\pi^*(\text{POXD})$                      |
| L+2                              | -1.24  | 0            | 6   | 93   | $\pi^*(\text{POXD})$                      |
| L+1                              | -1.49  | 3            | 93  | 3    | $\pi^*(\text{ML})$                        |
| L                                | -1.59  | 3            | 94  | 2    | $\pi^*(\text{ML})$                        |
| HOMO–LUMO energy gap ( 3.90 eV ) |        |              |     |      |                                           |
| H                                | -5.49  | 43           | 45  | 13   | $d(\text{Ir})+\pi(\text{ML}+\text{POXD})$ |
| H-1                              | -5.79  | 30           | 19  | 51   | $d(\text{Ir})+\pi(\text{ML}+\text{POXD})$ |
| H-2                              | -6.06  | 42           | 49  | 9    | $d(\text{Ir})+\pi(\text{ML})$             |
| H-3                              | -6.18  | 19           | 75  | 5    | $d(\text{Ir})+\pi(\text{ML})$             |
| H-4                              | -6.36  | 18           | 80  | 2    | $d(\text{Ir})+\pi(\text{ML})$             |
| H-5                              | -6.66  | 36           | 29  | 35   | $d(\text{Ir})+\pi(\text{ML}+\text{POXD})$ |
| H-6                              | -6.81  | 7            | 87  | 6    | $\pi(\text{ML})$                          |
| H-7                              | -7.25  | 0            | 100 | 0    | $\pi(\text{ML})$                          |
| H-8                              | -7.26  | 0            | 100 | 0    | $\pi(\text{ML})$                          |
| H-9                              | -7.38  | 3            | 53  | 44   | $\pi(\text{ML}+\text{POXD})$              |
| H-10                             | -7.42  | 0            | 89  | 10   | $\pi(\text{ML}+\text{POXD})$              |

**Table S3** Frontier molecular orbital energies (eV) and compositions (%) in the ground state for complex **3**. (Ir, ML and POXD denote the iridium atom, main ligand and N-(5-phenyl-1,3,4-oxadiazol-2-yl)-diphenylphosphinic amide ligand, respectively, in the complex.)

| MO                               | Energy | Compositions |    |      | Assignment             |
|----------------------------------|--------|--------------|----|------|------------------------|
|                                  |        | Ir           | ML | POXD |                        |
| L+10                             | -0.08  | 0            | 0  | 100  | $\pi^*$ (POXD)         |
| L+9                              | -0.20  | 1            | 4  | 95   | $\pi^*$ (POXD)         |
| L+8                              | -0.27  | 2            | 44 | 54   | $\pi^*$ (ML+POXD)      |
| L+7                              | -0.28  | 2            | 68 | 30   | $\pi^*$ (ML+POXD)      |
| L+6                              | -0.36  | 3            | 75 | 23   | $\pi^*$ (ML+POXD)      |
| L+5                              | -0.86  | 1            | 43 | 56   | $\pi^*$ (ML+POXD)      |
| L+4                              | -0.89  | 2            | 61 | 37   | $\pi^*$ (ML+POXD)      |
| L+3                              | -1.00  | 3            | 81 | 15   | $\pi^*$ (ML+POXD)      |
| L+2                              | -1.17  | 0            | 9  | 91   | $\pi^*$ (POXD)         |
| L+1                              | -1.57  | 2            | 97 | 1    | $\pi^*$ (ML)           |
| L                                | -1.63  | 2            | 97 | 1    | $\pi^*$ (ML)           |
| HOMO–LUMO energy gap ( 3.79 eV ) |        |              |    |      |                        |
| H                                | -5.42  | 37           | 59 | 3    | d(Ir)+ $\pi$ (ML)      |
| H-1                              | -5.81  | 30           | 15 | 55   | d(Ir)+ $\pi$ (ML+POXD) |
| H-2                              | -5.97  | 9            | 85 | 6    | $\pi$ (ML)             |
| H-3                              | -6.15  | 31           | 62 | 7    | d(Ir)+ $\pi$ (ML)      |
| H-4                              | -6.32  | 33           | 57 | 9    | d(Ir)+ $\pi$ (ML)      |
| H-5                              | -6.52  | 7            | 90 | 3    | $\pi$ (ML)             |
| H-6                              | -6.73  | 43           | 24 | 33   | d(Ir)+ $\pi$ (ML+POXD) |
| H-7                              | -7.34  | 4            | 9  | 87   | $\pi$ (POXD)           |
| H-8                              | -7.39  | 11           | 35 | 54   | d(Ir)+ $\pi$ (ML+POXD) |
| H-9                              | -7.44  | 0            | 1  | 98   | $\pi$ (POXD)           |
| H-10                             | -7.48  | 0            | 0  | 100  | $\pi$ (POXD)           |

**Table S4** Frontier molecular orbital energies (eV) and compositions (%) in the ground state for complex **4**. (Ir, ML and POXD denote the iridium atom, main ligand and N-(5-phenyl-1,3,4-oxadiazol-2-yl)-diphenylphosphinic amide ligand, respectively, in the complex.)

| MO                               | Energy | Compositions |    |      | Assignment             |
|----------------------------------|--------|--------------|----|------|------------------------|
|                                  |        | Ir           | ML | POXD |                        |
| L+10                             | -0.08  | 0            | 0  | 100  | $\pi^*$ (POXD)         |
| L+9                              | -0.17  | 0            | 46 | 53   | $\pi^*$ (ML+POXD)      |
| L+8                              | -0.22  | 1            | 84 | 16   | $\pi^*$ (ML+POXD)      |
| L+7                              | -0.27  | 1            | 51 | 49   | $\pi^*$ (ML+POXD)      |
| L+6                              | -0.3   | 1            | 19 | 81   | $\pi^*$ (ML+POXD)      |
| L+5                              | -0.83  | 2            | 85 | 13   | $\pi^*$ (ML+POXD)      |
| L+4                              | -0.87  | 2            | 55 | 43   | $\pi^*$ (ML+POXD)      |
| L+3                              | -0.9   | 1            | 52 | 46   | $\pi^*$ (ML+POXD)      |
| L+2                              | -1.17  | 0            | 4  | 96   | $\pi^*$ (POXD)         |
| L+1                              | -1.58  | 5            | 93 | 2    | $\pi^*$ (ML)           |
| L                                | -1.65  | 4            | 94 | 2    | $\pi^*$ (ML)           |
| HOMO–LUMO energy gap ( 3.76 eV ) |        |              |    |      |                        |
| H                                | -5.41  | 31           | 67 | 2    | d(Ir)+ $\pi$ (ML)      |
| H-1                              | -5.88  | 24           | 22 | 54   | d(Ir)+ $\pi$ (ML+POXD) |
| H-2                              | -5.92  | 5            | 83 | 13   | $\pi$ (ML+POXD)        |
| H-3                              | -6.27  | 61           | 29 | 10   | d(Ir)+ $\pi$ (ML+POXD) |
| H-4                              | -6.39  | 23           | 75 | 2    | d(Ir)+ $\pi$ (ML)      |
| H-5                              | -6.69  | 31           | 42 | 27   | d(Ir)+ $\pi$ (ML+POXD) |
| H-6                              | -6.82  | 14           | 75 | 11   | d(Ir)+ $\pi$ (ML+POXD) |
| H-7                              | -7.35  | 1            | 2  | 97   | $\pi$ (POXD)           |
| H-8                              | -7.44  | 1            | 6  | 94   | $\pi$ (POXD)           |
| H-9                              | -7.48  | 3            | 32 | 64   | $\pi$ (ML+POXD)        |
| H-10                             | -7.49  | 1            | 8  | 91   | $\pi$ (POXD)           |

**Table S5** Frontier molecular orbital energies (eV) and compositions (%) in the ground state for complex **5**. (Ir, ML and POXD denote the iridium atom, main ligand and N-(5-phenyl-1,3,4-oxadiazol-2-yl)-diphenylphosphinic amide ligand, respectively, in the complex.)

| MO                               | Energy | Compositions |    |      | Assignment                                |
|----------------------------------|--------|--------------|----|------|-------------------------------------------|
|                                  |        | Ir           | ML | POXD |                                           |
| L+10                             | 0.00   | 1            | 73 | 26   | $\pi^*(\text{ML}+\text{POXD})$            |
| L+9                              | -0.02  | 1            | 36 | 64   | $\pi^*(\text{ML}+\text{POXD})$            |
| L+8                              | -0.07  | 0            | 0  | 100  | $\pi^*(\text{POXD})$                      |
| L+7                              | -0.20  | 0            | 2  | 97   | $\pi^*(\text{POXD})$                      |
| L+6                              | -0.29  | 0            | 2  | 98   | $\pi^*(\text{POXD})$                      |
| L+5                              | -0.77  | 3            | 93 | 5    | $\pi^*(\text{ML})$                        |
| L+4                              | -0.86  | 1            | 38 | 61   | $\pi^*(\text{ML}+\text{POXD})$            |
| L+3                              | -0.90  | 2            | 59 | 39   | $\pi^*(\text{ML}+\text{POXD})$            |
| L+2                              | -1.16  | 0            | 6  | 94   | $\pi^*(\text{POXD})$                      |
| L+1                              | -1.48  | 3            | 95 | 2    | $\pi^*(\text{ML})$                        |
| L                                | -1.56  | 3            | 96 | 2    | $\pi^*(\text{ML})$                        |
| HOMO–LUMO energy gap ( 3.85 eV ) |        |              |    |      |                                           |
| H                                | -5.41  | 38           | 58 | 4    | $d(\text{Ir})+\pi(\text{ML})$             |
| H-1                              | -5.80  | 29           | 18 | 53   | $d(\text{Ir})+\pi(\text{ML}+\text{POXD})$ |
| H-2                              | -5.94  | 7            | 84 | 9    | $\pi(\text{ML})$                          |
| H-3                              | -6.12  | 29           | 67 | 4    | $d(\text{Ir})+\pi(\text{ML})$             |
| H-4                              | -6.24  | 48           | 46 | 6    | $d(\text{Ir})+\pi(\text{ML})$             |
| H-5                              | -6.62  | 19           | 62 | 19   | $d(\text{Ir})+\pi(\text{ML}+\text{POXD})$ |
| H-6                              | -6.71  | 26           | 52 | 22   | $d(\text{Ir})+\pi(\text{ML}+\text{POXD})$ |
| H-7                              | -7.09  | 1            | 98 | 1    | $\pi(\text{ML})$                          |
| H-8                              | -7.13  | 0            | 99 | 0    | $\pi(\text{ML})$                          |
| H-9                              | -7.34  | 1            | 5  | 94   | $\pi(\text{POXD})$                        |
| H-10                             | -7.42  | 1            | 25 | 74   | $\pi(\text{ML}+\text{POXD})$              |

**Table S6** Selected calculated wavelength  $\lambda$ (nm), oscillator strength  $f$ , major contribution, transition characters, and the available experimental wavelengths (nm) for complexes **1–5**. (H and L indicate HOMO and LUMO, respectively.)

|                 | State           | $\lambda$ (nm)/E(eV) | $f$          | Configuration                             | Assignment                                | Nature         | Exp. <sup>a</sup> |
|-----------------|-----------------|----------------------|--------------|-------------------------------------------|-------------------------------------------|----------------|-------------------|
| <b>1</b>        | S <sub>1</sub>  | 461/2.688            | 0.0231       | H→L(90%)                                  | d(Ir)+ $\pi$ (ML+POXD)→ $\pi^*$ (ML)      | MLCT/LLCT/ILCT | 453               |
|                 | S <sub>11</sub> | 321/3.855            | 0.1624       | H-4→L(76%)                                | d(Ir)+ $\pi$ (ML+POXD)→ $\pi^*$ (ML)      | MLCT/LLCT/ILCT |                   |
|                 | S <sub>14</sub> | 311/3.986            | 0.1011       | H-4→L+1(41%)                              | d(Ir)+ $\pi$ (ML+POXD)→ $\pi^*$ (ML))     | MLCT/LLCT/ILCT |                   |
|                 |                 |                      |              | H-1→L+2(30%)                              | d(Ir)+ $\pi$ (ML+POXD)→ $\pi^*$ (POXD)    | MLCT/LLCT/ILCT |                   |
|                 | S <sub>17</sub> | 298/4.159            | 0.1085       | H-5→L+1(47%)                              | $\pi$ (ML)→ $\pi^*$ (ML)                  | ILCT           |                   |
|                 |                 |                      |              | H-6→L(13%)                                | $\pi$ (ML)→ $\pi^*$ (ML)                  | ILCT           |                   |
|                 | S <sub>18</sub> | 294/4.215            | 0.1020       | H-1→L+3(59%)                              | d(Ir)+ $\pi$ (ML+POXD)→ $\pi^*$ (ML)      | MLCT/LLCT/ILCT |                   |
|                 |                 |                      |              | H-5→L(22%)                                | $\pi$ (ML)→ $\pi^*$ (ML)                  | ILCT           |                   |
|                 | S <sub>23</sub> | 285/4.342            | 0.0804       | H-7→L(45%)                                | $\pi$ (ML+POXD)→ $\pi^*$ (ML)             | LLCT/ILCT      |                   |
|                 |                 |                      |              | H-1→L+5(32%)                              | d(Ir)+ $\pi$ (ML+POXD)→ $\pi^*$ (ML)      | MLCT/LLCT/ILCT |                   |
| S <sub>39</sub> | 258/4.801       | 0.1379               | H-4→L+2(36%) | d(Ir)+ $\pi$ (ML+POXD)→ $\pi^*$ (POXD)    | MLCT/LLCT/ILCT                            |                |                   |
|                 |                 |                      | H-3→L+3(23%) | d(Ir)+ $\pi$ (ML+POXD)→ $\pi^*$ (ML)      | MLCT/LLCT/ILCT                            |                |                   |
| <b>2</b>        | S <sub>1</sub>  | 418/2.965            | 0.0382       | H→L(94%)                                  | d(Ir)+ $\pi$ (ML+POXD)→ $\pi^*$ (ML)      | MLCT/LLCT/ILCT |                   |
|                 | S <sub>5</sub>  | 350/3.535            | 0.0838       | H-2→L(62%)                                | d(Ir)+ $\pi$ (ML)→ $\pi^*$ (ML)           | MLCT/ILCT      |                   |
|                 |                 |                      |              | H-3→L(11%)                                | d(Ir)+ $\pi$ (ML)→ $\pi^*$ (ML)           | MLCT/ILCT      |                   |
|                 | S <sub>10</sub> | 321/3.851            | 0.2131       | H-1→L+2(67%)                              | d(Ir)+ $\pi$ (ML+POXD)→ $\pi^*$ (POXD)    | MLCT/LLCT/ILCT |                   |
|                 |                 |                      |              | H→L+5(12%)                                | d(Ir)+ $\pi$ (ML+POXD)→ $\pi^*$ (ML)      | MLCT/LLCT/ILCT |                   |
|                 | S <sub>13</sub> | 310/3.988            | 0.4552       | H-3→L+1(63%)                              | d(Ir)+ $\pi$ (ML)→ $\pi^*$ (ML)           | MLCT/ILCT      |                   |
|                 |                 |                      |              | H-2→L+1(14%)                              | d(Ir)+ $\pi$ (ML)→ $\pi^*$ (ML)           | MLCT/ILCT      |                   |
|                 | S <sub>15</sub> | 305/4.063            | 0.1649       | H-1→L+4(74%)                              | d(Ir)+ $\pi$ (ML+POXD)→ $\pi^*$ (ML)      | MLCT/LLCT/ILCT |                   |
|                 |                 |                      |              | H-4→L(13%)                                | d(Ir)+ $\pi$ (ML)→ $\pi^*$ (ML)           | MLCT/ILCT      |                   |
|                 | S <sub>23</sub> | 285/4.345            | 0.1828       | H-3→L+2(36%)                              | d(Ir)+ $\pi$ (ML)→ $\pi^*$ (POXD)         | MLCT/LLCT      |                   |
| H-5→L+1(30%)    |                 |                      |              | d(Ir)+ $\pi$ (ML+POXD)→ $\pi^*$ (ML)      | MLCT/LLCT/ILCT                            |                |                   |
| <b>3</b>        | S <sub>1</sub>  | 422/2.935            | 0.0225       | H→L(94%)                                  | d(Ir)+ $\pi$ (ML)→ $\pi^*$ (ML)           | MLCT/ILCT      |                   |
|                 | S <sub>12</sub> | 317/3.908            | 0.1389       | H-1→L+2(63%)                              | d(Ir)+ $\pi$ (ML+POXD)→ $\pi^*$ (POXD)    | MLCT/LLCT/ILCT |                   |
|                 |                 |                      |              | H-1→L+3(18%)                              | d(Ir)+ $\pi$ (ML+POXD)→ $\pi^*$ (ML+POXD) | MLCT/LLCT/ILCT |                   |
|                 | S <sub>15</sub> | 309/4.005            | 0.3245       | H-1→L+3(42%)                              | d(Ir)+ $\pi$ (ML+POXD)→ $\pi^*$ (ML+POXD) | MLCT/LLCT/ILCT |                   |
|                 |                 |                      |              | H-1→L+2(32%)                              | d(Ir)+ $\pi$ (ML+POXD)→ $\pi^*$ (POXD)    | MLCT/LLCT/ILCT |                   |
|                 | S <sub>24</sub> | 287/4.315            | 0.1123       | H-2→L+3(28%)                              | $\pi$ (ML)→ $\pi^*$ (ML+POXD)             | LLCT/ILCT      |                   |
|                 |                 |                      |              | H-3→L+2(22%)                              | d(Ir)+ $\pi$ (ML)→ $\pi^*$ (POXD)         | MLCT/LLCT      |                   |
|                 | S <sub>28</sub> | 281/4.407            | 0.2549       | H-6→L+1(21%)                              | d(Ir)+ $\pi$ (ML+POXD)→ $\pi^*$ (ML)      | MLCT/LLCT/ILCT |                   |
|                 |                 |                      |              | H-3→L+3(20%)                              | d(Ir)+ $\pi$ (ML)→ $\pi^*$ (ML+POXD)      | MLCT/LLCT/ILCT |                   |
|                 | S <sub>41</sub> | 258/4.792            | 0.1425       | H-5→L+2(17%)                              | $\pi$ (ML)→ $\pi^*$ (POXD)                | LLCT           |                   |
| H-2→L+6(14%)    |                 |                      |              | $\pi$ (ML)→ $\pi^*$ (ML+POXD)             | LLCT/ILCT                                 |                |                   |
| <b>4</b>        | S <sub>1</sub>  | 426/2.906            | 0.0526       | H→L(92%)                                  | d(Ir)+ $\pi$ (ML)→ $\pi^*$ (ML)           | MLCT/ILCT      |                   |
|                 | S <sub>10</sub> | 332/3.731            | 0.1269       | H-2→L+1(32%)                              | $\pi$ (ML+POXD)→ $\pi^*$ (ML)             | LLCT/ILCT      |                   |
|                 |                 |                      |              | H→L+3(27%)                                | d(Ir)+ $\pi$ (ML)→ $\pi^*$ (ML+POXD)      | MLCT/LLCT/ILCT |                   |
|                 | S <sub>14</sub> | 310/3.995            | 0.3556       | H-1→L+2(71%)                              | d(Ir)+ $\pi$ (ML+POXD)→ $\pi^*$ (POXD)    | MLCT/LLCT/ILCT |                   |
|                 | S <sub>15</sub> | 305/4.053            | 0.2103       | H-4→L+1(66%)                              | d(Ir)+ $\pi$ (ML)→ $\pi^*$ (ML)           | MLCT/ILCT      |                   |
|                 |                 |                      |              | H-1→L+2(11%)                              | d(Ir)+ $\pi$ (ML+POXD)→ $\pi^*$ (POXD)    | MLCT/LLCT/ILCT |                   |
| S <sub>21</sub> | 288/4.304       | 0.0901               | H-1→L+5(48%) | d(Ir)+ $\pi$ (ML+POXD)→ $\pi^*$ (ML+POXD) | MLCT/LLCT/ILCT                            |                |                   |

|                  |           |        |              |                                                                        |                |
|------------------|-----------|--------|--------------|------------------------------------------------------------------------|----------------|
|                  |           |        | H-2→L+5(15%) | $\pi(\text{ML}+\text{POXD})\rightarrow\pi^*(\text{ML}+\text{POXD})$    | LLCT/ILCT      |
| S <sub>33</sub>  | 268/4.616 | 0.2617 | H→L+9(46%)   | $d(\text{Ir})+\pi(\text{ML})\rightarrow\pi^*(\text{ML}+\text{POXD})$   | MLCT/LLCT/ILCT |
| S <sub>37</sub>  | 259/4.781 | 0.1167 | H-4→L+4(31%) | $d(\text{Ir})+\pi(\text{ML})\rightarrow\pi^*(\text{ML}+\text{POXD})$   | MLCT/LLCT/ILCT |
|                  |           |        | H-4→L+3(23%) | $d(\text{Ir})+\pi(\text{ML})\rightarrow\pi^*(\text{ML}+\text{POXD})$   | MLCT/LLCT/ILCT |
| S <sub>40</sub>  | 256/4.841 | 0.1454 | H-5→L+2(61%) | $d(\text{Ir})+\pi(\text{ML}+\text{POXD})\rightarrow\pi^*(\text{POXD})$ | MLCT/LLCT/ILCT |
| 5 S <sub>1</sub> | 417/2.968 | 0.0681 | H→L(93%)     | $d(\text{Ir})+\pi(\text{ML})\rightarrow\pi^*(\text{ML})$               | MLCT/ILCT      |
| S <sub>6</sub>   | 343/3.604 | 0.0924 | H-2→L(40%)   | $\pi(\text{ML})\rightarrow\pi^*(\text{ML})$                            | ILCT           |
|                  |           |        | H-3→L(26%)   | $d(\text{Ir})+\pi(\text{ML})\rightarrow\pi^*(\text{ML})$               | MLCT/ILCT      |
| S <sub>10</sub>  | 325/3.810 | 0.1326 | H→L+5(34%)   | $d(\text{Ir})+\pi(\text{ML})\rightarrow\pi^*(\text{ML})$               | MLCT/ILCT      |
| S <sub>11</sub>  | 319/3.876 | 0.2846 | H-2→L+1(45%) | $\pi(\text{ML})\rightarrow\pi^*(\text{ML})$                            | ILCT           |
|                  |           |        | H-3→L+1(24%) | $d(\text{Ir})+\pi(\text{ML})\rightarrow\pi^*(\text{ML})$               | MLCT/ILCT      |
| S <sub>14</sub>  | 313/3.955 | 0.4721 | H-4→L(54%)   | $d(\text{Ir})+\pi(\text{ML})\rightarrow\pi^*(\text{ML})$               | MLCT/ILCT      |
|                  |           |        | H-3→L(29%)   | $d(\text{Ir})+\pi(\text{ML})\rightarrow\pi^*(\text{ML})$               | MLCT/ILCT      |
| S <sub>25</sub>  | 281/4.402 | 0.1679 | H-2→L+5(32%) | $\pi(\text{ML})\rightarrow\pi^*(\text{ML})$                            | ILCT           |
| S <sub>31</sub>  | 271/4.570 | 0.1160 | H-2→L+5(29%) | $\pi(\text{ML})\rightarrow\pi^*(\text{ML})$                            | ILCT           |
|                  |           |        | H-3→L+5(25%) | $d(\text{Ir})+\pi(\text{ML})\rightarrow\pi^*(\text{ML})$               | MLCT/ILCT      |
| S <sub>33</sub>  | 268/4.620 | 0.1118 | H→L+10(28%)  | $d(\text{Ir})+\pi(\text{ML})\rightarrow\pi^*(\text{ML}+\text{POXD})$   | MLCT/LLCT/ILCT |
|                  |           |        | H→L+6(19%)   | $d(\text{Ir})+\pi(\text{ML})\rightarrow\pi^*(\text{POXD})$             | MLCT/LLCT      |
| S <sub>40</sub>  | 258/4.802 | 0.2203 | H-5→L+2(54%) | $d(\text{Ir})+\pi(\text{ML}+\text{POXD})\rightarrow\pi^*(\text{POXD})$ | MLCT/LLCT/ILCT |
|                  |           |        | H-6→L+2(25%) | $d(\text{Ir})+\pi(\text{ML}+\text{POXD})\rightarrow\pi^*(\text{POXD})$ | MLCT/LLCT/ILCT |

<sup>a</sup> Ref. 17

**Table S7** Partial frontier molecular orbital composition (%) of complexes **1–5** in the triplet excited states. (H and L indicate HOMO and LUMO, respectively)

|          | MO  | Energy/e<br>V | Composition (%) |    |      | Assignment           |
|----------|-----|---------------|-----------------|----|------|----------------------|
|          |     |               | Ir              | ML | POXD |                      |
| <b>1</b> | L   | -2.10         | 4               | 95 | 1    | $\pi^*(ML)$          |
|          | H   | -5.35         | 40              | 40 | 20   | $d(Ir)+\pi(ML)$      |
|          | H-2 | -6.14         | 33              | 36 | 31   | $d(Ir)+\pi(ML+POXD)$ |
| <b>2</b> | L+1 | -1.57         | 4               | 94 | 2    | $\pi^*(ML)$          |
|          | L   | -1.78         | 3               | 95 | 3    | $\pi^*(ML)$          |
|          | H   | -5.33         | 40              | 45 | 15   | $d(Ir)+\pi(ML+POXD)$ |
| <b>3</b> | H-2 | -6.02         | 23              | 65 | 11   | $d(Ir)+\pi(ML+POXD)$ |
|          | L   | -1.83         | 1               | 98 | 1    | $\pi^*(ML)$          |
|          | H   | -5.30         | 32              | 64 | 3    | $d(Ir)+\pi(ML)$      |
| <b>4</b> | H-1 | -5.69         | 29              | 31 | 40   | $d(Ir)+\pi(ML+POXD)$ |
|          | L   | -1.88         | 4               | 94 | 2    | $\pi^*(ML)$          |
|          | H   | -5.20         | 24              | 73 | 3    | $d(Ir)+\pi(ML)$      |
| <b>5</b> | L   | -1.76         | 3               | 96 | 1    | $\pi^*(ML)$          |
|          | H   | -5.24         | 34              | 58 | 8    | $d(Ir)+\pi(ML)$      |
|          | H-1 | -5.77         | 28              | 33 | 39   | $d(Ir)+\pi(ML+POXD)$ |
